# Supplementary material for: Meteorological Impacts on Rubber Tree Powdery Mildew and Projections of Its Future Spatiotemporal Pattern
Source: MDPI journal article supplement (doi:10.3390/agriculture14040619), 2024-04-16
Supplement: s1 [file s1]

---

# Supplementary materials for Meteorological attribution on rubber tree powdery mildew and its future projection on spatiotemporal pattern

Jiayan Kong <sup>1</sup>, Lan Wu <sup>1</sup>, Jiaxin Cao <sup>1</sup>, Wei Cui <sup>2</sup>, Tangzhe Nie <sup>3,4</sup>, Yinghe An <sup>1</sup> and Zhongyi Sun <sup>1,5,6\*</sup>

<sup>1</sup> Ecology and Environment College, Hainan University, Haikou 570208, China; 21220951320139@hainanu.edu.cn; wulan@hainanu.edu.cn; 20071300210023@hainanu.edu.cn; 19840776157@163.com; anyinghe@hainanu.edu.cn;

<sup>2</sup> Development Research Center, National Forestry and Grassland Administration, Beijing 100714, China; cuiwei1231@hotmail.com

<sup>3</sup> Key Laboratory of Effective Utilization of Agricultural Water Resources, Ministry of Agriculture and Rural Affairs, Northeast Agricultural University, Harbin 150030, China; 2019036@hlju.edu.cn;

<sup>4</sup> School of Water Conservancy and Electric Power, Heilongjiang University, Harbin, 150080, China;

<sup>5</sup> Danzhou Investigation & Experiment Station of Tropical Crops, Ministry of Agriculture, Rubber Research Institute, Chinese Academy of Tropical Agricultural Sciences, Danzhou 571737, China;

<sup>6</sup> Sanya Tropical ecosystem Carbon Source and Sink Field Scientific Observation and Research Station, Sanya 572000, China

\* Correspondence: gis.rs@hainanu.edu.cn

**Table S1** Disease index of rubber tree powdery mildew in Hainan from 1962 to 2009

| Year | DI   | Year | DI   | Year | DI   | Year | DI   |
|------|------|------|------|------|------|------|------|
| 1962 | 21.2 | 1974 | 27.3 | 1986 | 46.8 | 1998 | 52.8 |
| 1963 | 16.1 | 1975 | 25.1 | 1987 | 52.7 | 1999 | 24.1 |
| 1964 | 29.7 | 1976 | 12.2 | 1988 | 54.0 | 2000 | 47.8 |
| 1965 | 22.6 | 1977 | 38.2 | 1989 | 47.6 | 2001 | 53.1 |
| 1966 | 33.6 | 1978 | 60.2 | 1990 | 49.9 | 2002 | 34.4 |
| 1967 | 19.1 | 1979 | 21.6 | 1991 | 45.1 | 2003 | 24.7 |
| 1968 | 17.8 | 1980 | 46.1 | 1992 | 44.1 | 2004 | 69.5 |
| 1969 | 40.8 | 1981 | 18.8 | 1993 | 46.0 | 2005 | 63.5 |
| 1970 | 24.7 | 1982 | 25.5 | 1994 | 44.9 | 2006 | 54.6 |
| 1971 | 7.9  | 1983 | 36.8 | 1995 | 55.0 | 2007 | 39.2 |
| 1972 | 29.2 | 1984 | 48.3 | 1996 | 44.0 | 2008 | 42.8 |
| 1973 | 5.4  | 1985 | 41.3 | 1997 | 32.5 | 2009 | 24.1 |

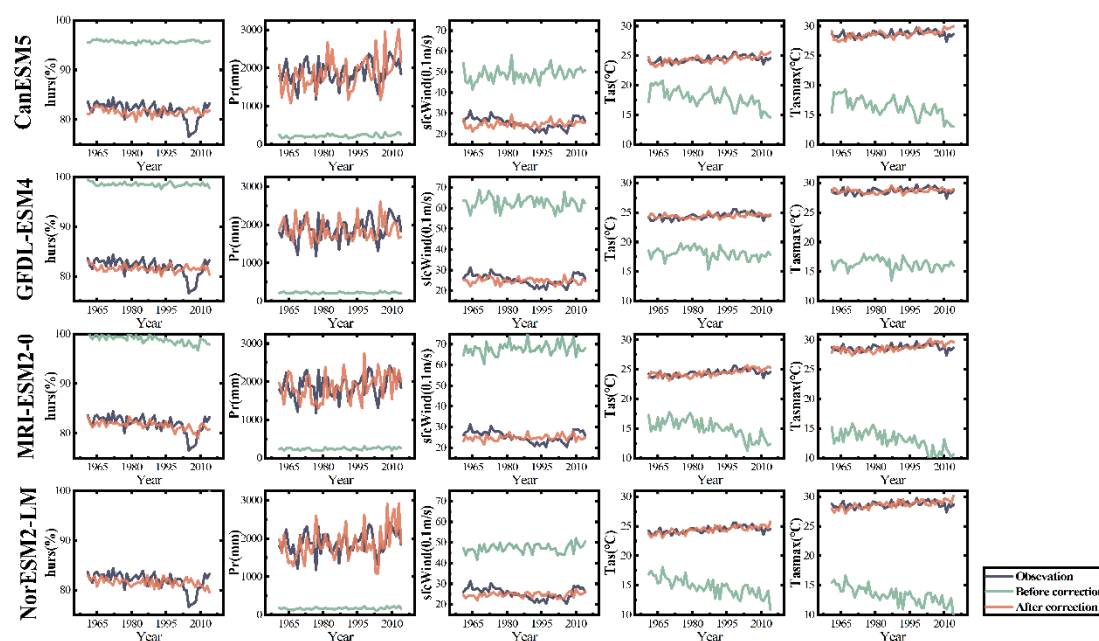

**Figure S1** Comparison of five meteorological factors before and after correction of four CMIP6 models based on EQM

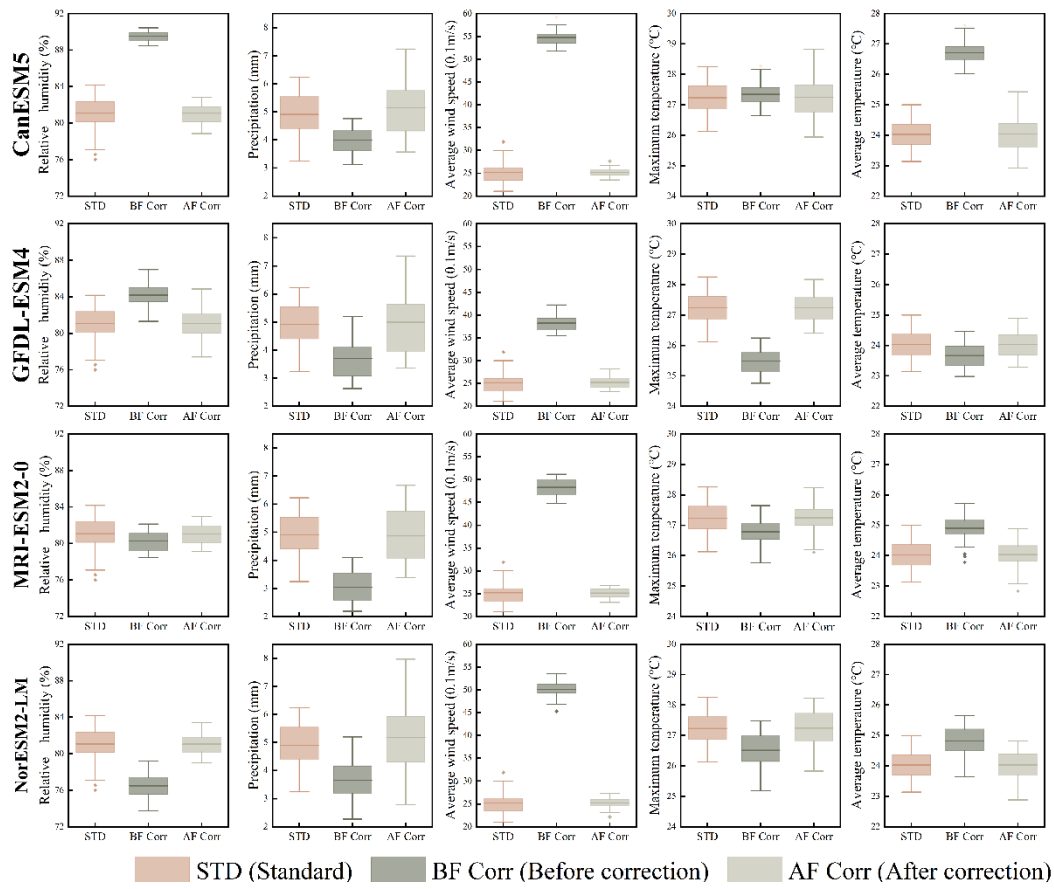

**Figure S2** Comparison of five meteorological factors before and after correction of four CMIP6 models based on QM

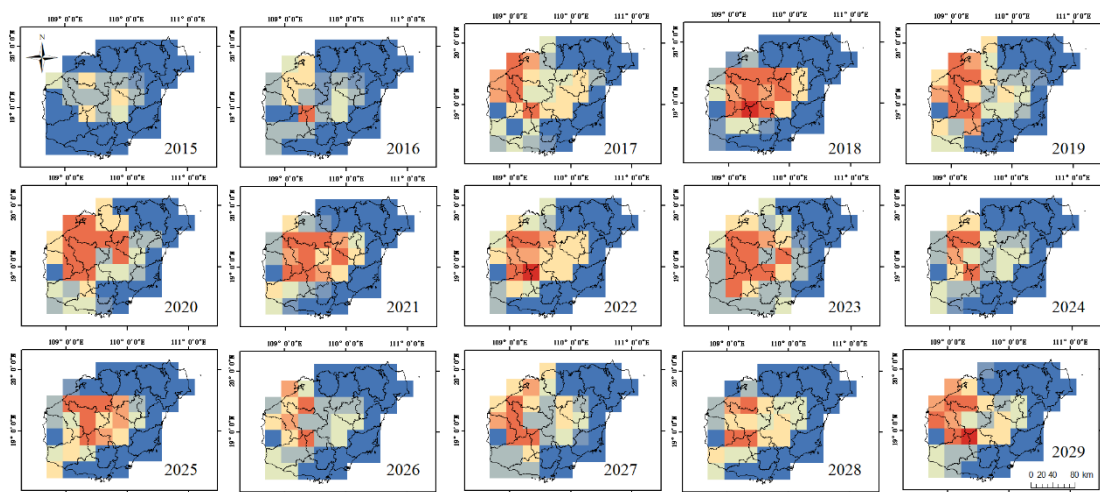

**Figure S3** Distribution of RTPM-DI in Hainan Island from 2015 to 2029 under the SSP245 scenario

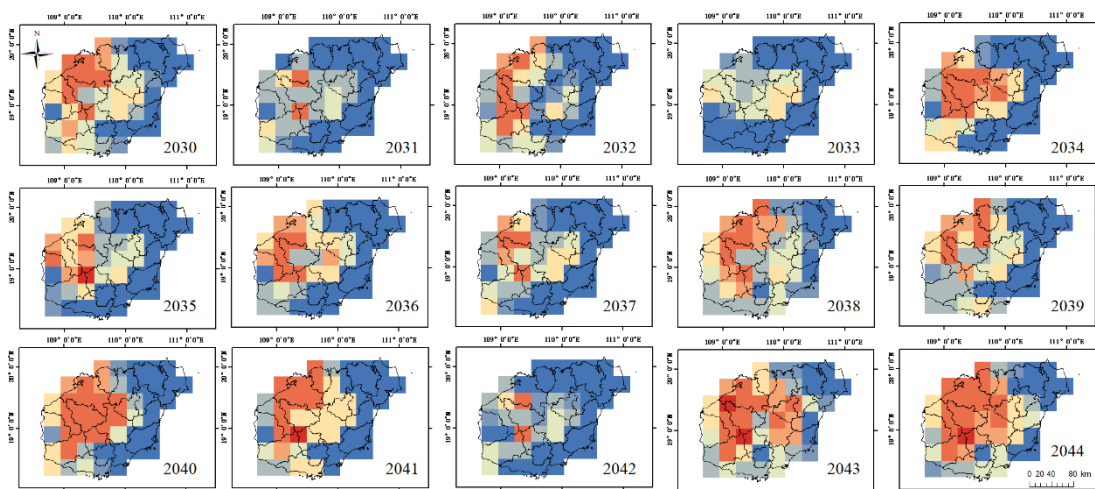

**Figure S4** Distribution of RTPM-DI in Hainan Island from 2030 to 2044 under the  
SSP245 scenario

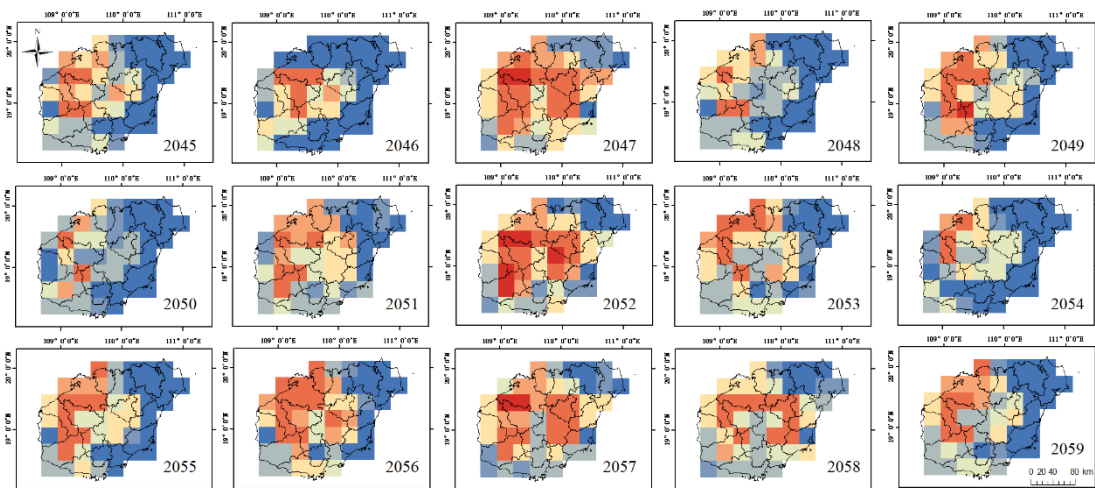

**Figure S5** Distribution of RTPM-DI in Hainan Island from 2045 to 2059 under the  
SSP245 scenario

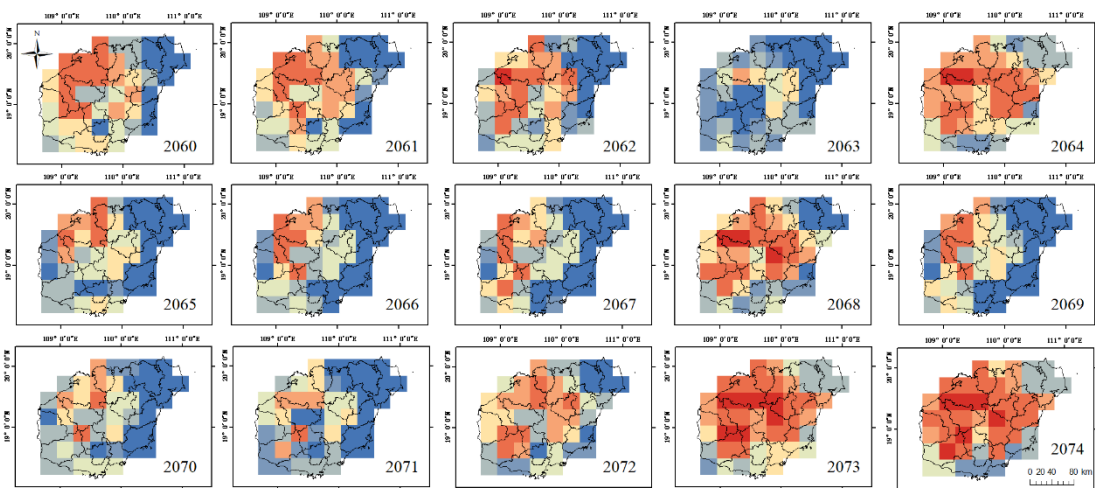

**Figure S6** Distribution of RTPM-DI in Hainan Island from 2060 to 2074 under the SSP245 scenario

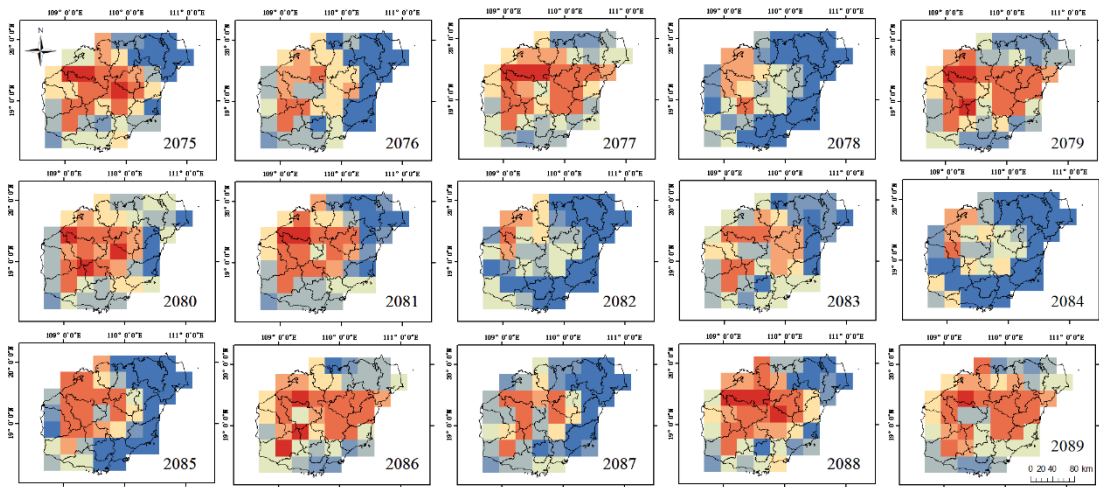

**Figure S7** Distribution of RTPM-DI in Hainan Island from 2075 to 2089 under the SSP245 scenario

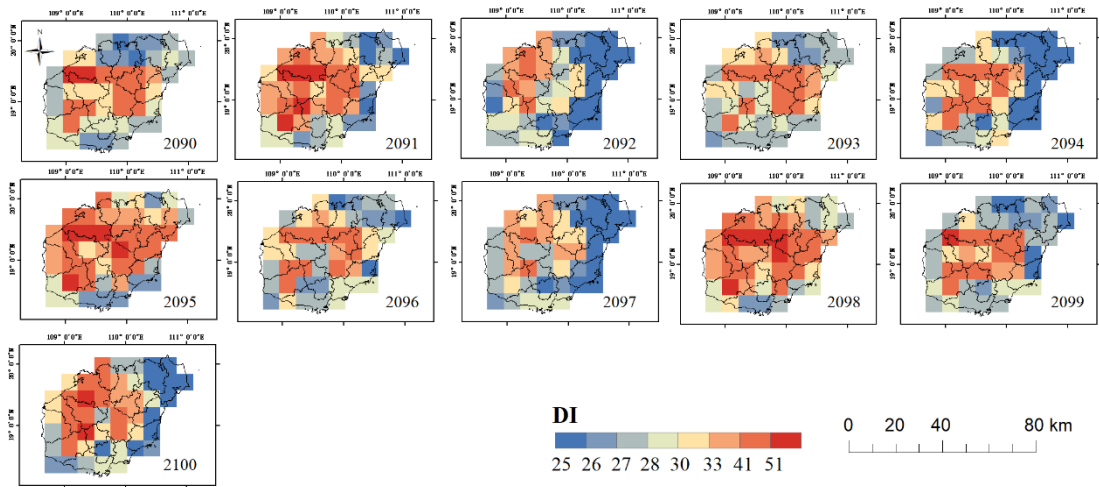

**Figure S8** Distribution of RTPM-DI in Hainan Island from 2090 to 2100 under the SSP245 scenario

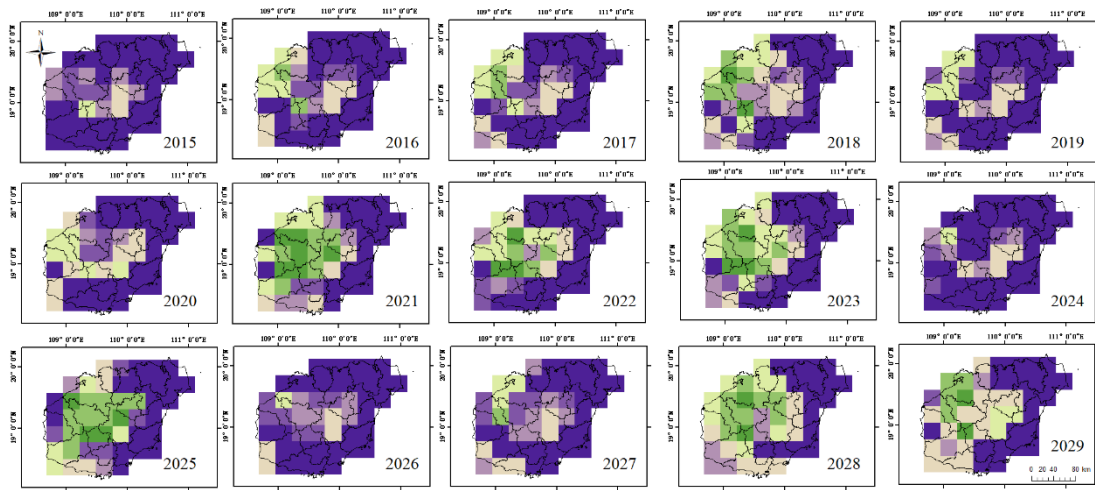

**Figure S9** Distribution of RTPM-DI in Hainan Island from 2015 to 2029 under the SSP585 scenario

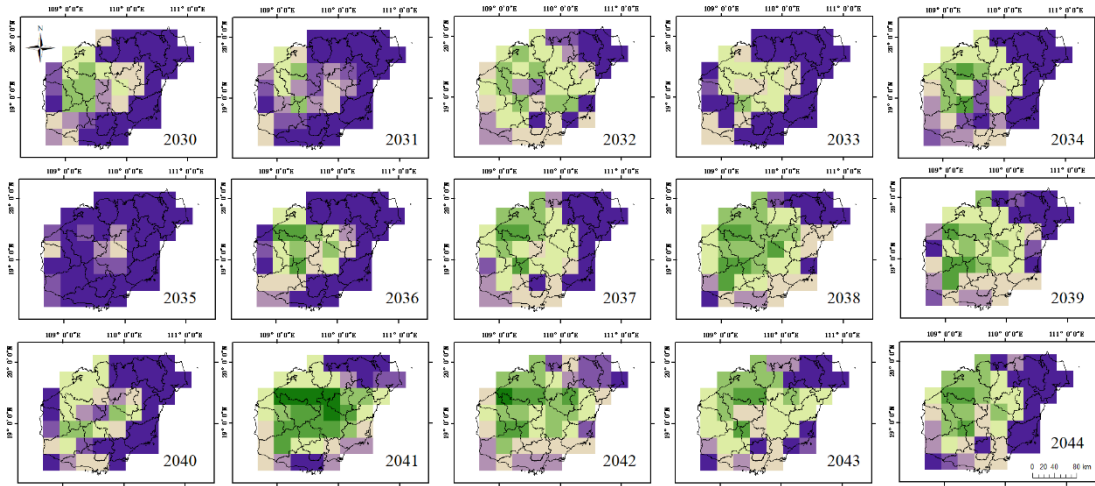

**Figure S10** Distribution of RTPM-DI in Hainan Island from 2030 to 2044 under the SSP585 scenario

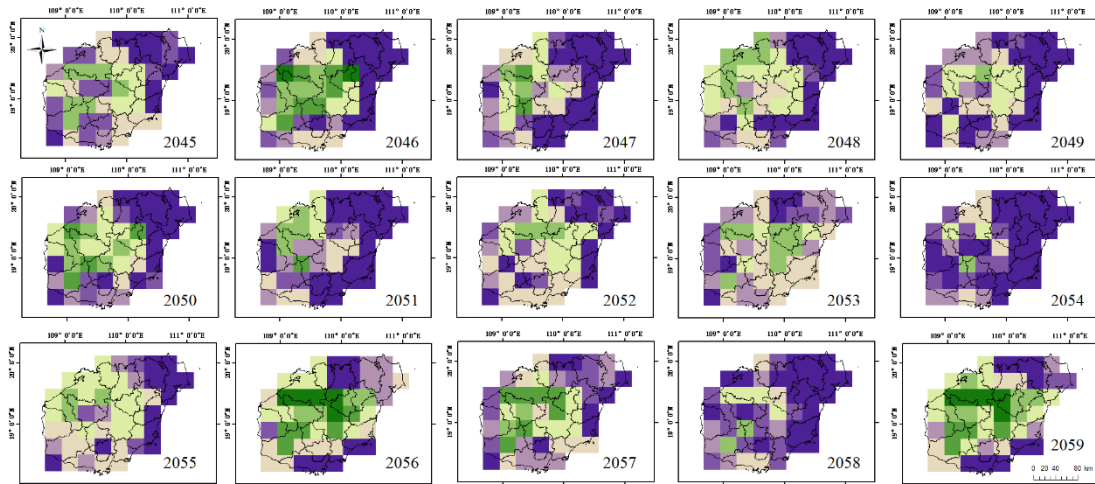



**Figure S11** Distribution of RTPM-DI in Hainan Island from 2045 to 2059 under the  
SSP585 scenario

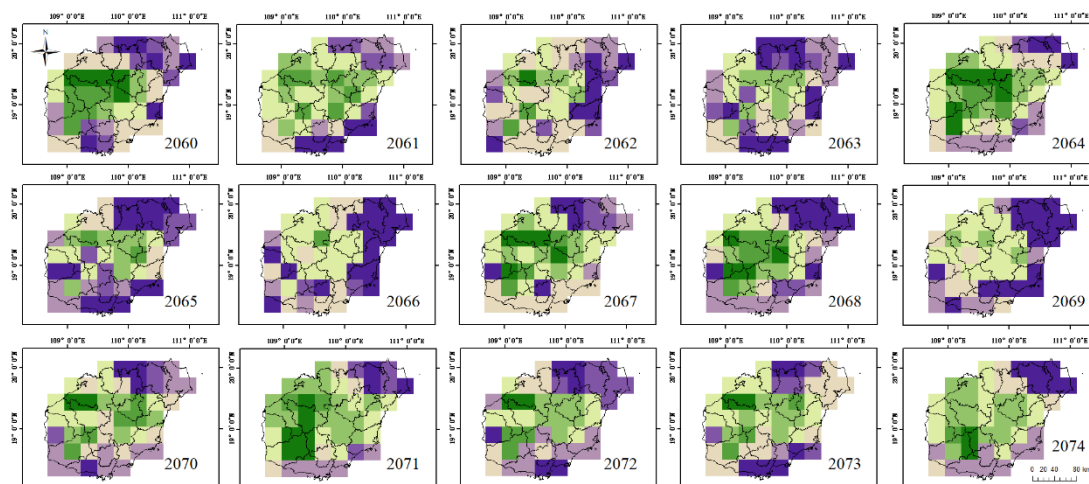

**Figure S12** Distribution of RTPM-DI in Hainan Island from 2060 to 2074 under the  
SSP585 scenario

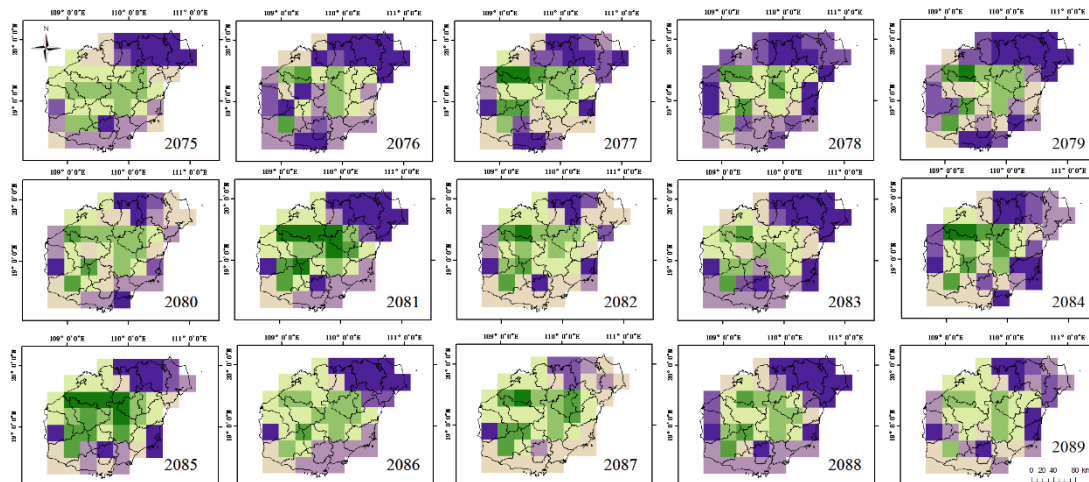

**Figure S13** Distribution of RTPM-DI in Hainan Island from 2075 to 2089 under the  
SSP585 scenario

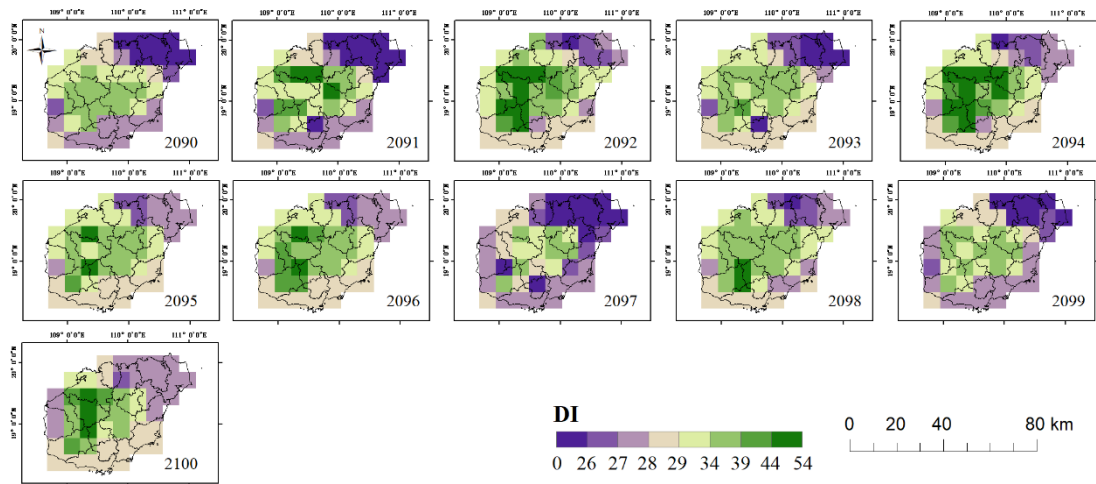

**Figure S14** Distribution of RTPM-DI in Hainan Island from 2090 to 2100 under the SSP585 scenario
